# Supplementary material for: Renewable-power-assisted production of hydrogen and liquid hydrocarbons from natural gas: techno-economic analysis
Source: Royal Society of Chemistry journal article supplement (doi:10.1039/d2se00509c), 2022-01-01
Supplement: d2se00509c1.pdf [file d2se00509c1.pdf]

## Supplemental Information

# Renewable-power-assisted production of hydrogen and liquid hydrocarbons from natural gas: techno-economic analysis

Mohammad Ostadi<sup>\*a</sup>, Magne Hillestad<sup>b</sup>

<sup>a</sup>*MIT Energy Initiative, Massachusetts Institute of Technology, 77 Massachusetts Avenue, Cambridge, MA 02139, United States; E-mail: mostadi@mit.edu*

<sup>b</sup>*Department of Chemical Engineering, Norwegian University of Science and Technology, NO 7491 Trondheim, Norway; E-mail: magne.hillestad@ntnu.no*

Table S1 Important stream information of configuration 1 - SOEC (NG1)

| Stream                          | 100   | 101   | 102   | 103   | 104   | 105   | 106   | 107   | 108   |
|---------------------------------|-------|-------|-------|-------|-------|-------|-------|-------|-------|
| Temperature [°C]                | 50    | 234.6 | 650   | 1050  | 210   | 210   | 210   | 60    | 79    |
| Pressure [bar]                  | 30    | 30    | 29    | 28    | 26    | 24    | 22    | 20    | 30    |
| Mass flow [t/h]                 | 104.7 | 113.9 | 311.9 | 437.9 | 320.9 | 186.1 | 131.8 | 86.93 | 93.34 |
| Molar flow [kmol/h]             | 6000  | 6322  | 16146 | 30034 | 23603 | 10835 | 5782  | 369   | 3097  |
| Mole fractions                  |       |       |       |       |       |       |       |       |       |
| CO                              | 0.000 | 0.000 | 0.025 | 0.247 | 0.315 | 0.271 | 0.201 | 0.009 | 0.127 |
| H <sub>2</sub>                  | 0.000 | 0.000 | 0.091 | 0.468 | 0.598 | 0.514 | 0.381 | 0.009 | 0.199 |
| H <sub>2</sub> O                | 0.000 | 1.000 | 0.348 | 0.219 | 0.003 | 0.004 | 0.004 | 0.014 | 0.004 |
| CH <sub>4</sub>                 | 0.950 | 0.000 | 0.411 | 0.005 | 0.007 | 0.032 | 0.075 | 0.004 | 0.129 |
| C <sub>2</sub> - C <sub>4</sub> | 0.045 | 0.000 | 0.007 | 0.000 | 0.000 | 0.008 | 0.020 | 0.016 | 0.036 |
| C <sub>5+</sub> (alkanes)       | 0.000 | 0.000 | 0.002 | 0.000 | 0.000 | 0.003 | 0.005 | 0.801 | 0.008 |
| C <sub>5+</sub> (alkenes)       | 0.005 | 0.000 | 0.000 | 0.000 | 0.000 | 0.001 | 0.001 | 0.078 | 0.002 |
| CO <sub>2</sub>                 | 0.000 | 0.000 | 0.117 | 0.061 | 0.078 | 0.168 | 0.313 | 0.068 | 0.494 |
| N <sub>2</sub>                  | 0.000 | 0.000 | 0.000 | 0.000 | 0.000 | 0.000 | 0.000 | 0.000 | 0.000 |

Table S2 Important stream information of configuration 2 - E-SMR (NG1)

| Stream                          | 100   | 101   | 102   | 103   | 104   | 105   | 106   | 107   | 108   | 109   | 110   |
|---------------------------------|-------|-------|-------|-------|-------|-------|-------|-------|-------|-------|-------|
| Temperature [°C]                | 50    | 234.6 | 500   | 850   | 300   | 300   | 210   | 210   | 210   | 60    | 79    |
| Pressure [bar]                  | 30    | 30    | 29    | 28    | 5     | 28    | 26    | 24    | 22    | 20    | 30    |
| Mass flow [t/h]                 | 104.7 | 577.5 | 995.2 | 995.2 | 20.41 | 974.8 | 545.8 | 419.3 | 368.9 | 80.07 | 313.1 |
| Molar flow [kmol/h]             | 6000  | 32054 | 48456 | 61744 | 10123 | 51622 | 28744 | 16724 | 11966 | 362   | 8921  |
| Mole fractions                  |       |       |       |       |       |       |       |       |       |       |       |
| CO                              | 0.000 | 0.000 | 0.008 | 0.114 | 0.000 | 0.136 | 0.244 | 0.167 | 0.092 | 0.005 | 0.044 |
| H <sub>2</sub>                  | 0.000 | 0.000 | 0.061 | 0.364 | 1.000 | 0.240 | 0.464 | 0.317 | 0.176 | 0.005 | 0.068 |
| H <sub>2</sub> O                | 0.000 | 1.000 | 0.632 | 0.387 | 0.000 | 0.463 | 0.003 | 0.004 | 0.004 | 0.008 | 0.004 |
| CH <sub>4</sub>                 | 0.950 | 0.000 | 0.157 | 0.026 | 0.000 | 0.031 | 0.055 | 0.106 | 0.156 | 0.011 | 0.194 |
| C <sub>2</sub> - C <sub>4</sub> | 0.045 | 0.000 | 0.003 | 0.000 | 0.000 | 0.000 | 0.000 | 0.005 | 0.010 | 0.008 | 0.014 |
| C <sub>5+</sub> (alkanes)       | 0.000 | 0.000 | 0.001 | 0.000 | 0.000 | 0.000 | 0.000 | 0.002 | 0.004 | 0.757 | 0.005 |
| C <sub>5+</sub> (alkenes)       | 0.005 | 0.000 | 0.000 | 0.000 | 0.000 | 0.000 | 0.000 | 0.000 | 0.001 | 0.071 | 0.001 |
| CO <sub>2</sub>                 | 0.000 | 0.000 | 0.138 | 0.109 | 0.000 | 0.131 | 0.233 | 0.399 | 0.557 | 0.135 | 0.670 |
| N <sub>2</sub>                  | 0.000 | 0.000 | 0.000 | 0.000 | 0.000 | 0.000 | 0.000 | 0.000 | 0.000 | 0.000 | 0.000 |

Table S3 Water balance in both configurations (NG1)

| Water stream [t/h]           | Config 1 - SOEC | Config 2 - E-SMR |
|------------------------------|-----------------|------------------|
| Water demand in Reformer     | 113.7           | 577.5            |
| Water demand in SOEC         | 206.3           | 0                |
| Retrieved water from syngas  | 116.8           | 431              |
| Retrieved water from product | 126.6           | 119.7            |
| Unconverted in SOEC          | 40.7            | 0                |
| <b>Net demand</b>            | <b>35.9</b>     | <b>26.8</b>      |

Table S4 List of direct and indirect costs as a fraction of purchased equipment cost<sup>1</sup>

| Direct Costs                        | Fraction of purchased equipment |
|-------------------------------------|---------------------------------|
| Purchased equipment installation    | 0.47                            |
| Instrumentation&Controls(installed) | 0.36                            |
| Piping (installed)                  | 0.68                            |
| Electrical systems (installed)      | 0.11                            |
| Buildings (including services)      | 0.18                            |
| Yard improvements                   | 0.10                            |
| Service facilities (installed)      | 0.55                            |
| <b>Total direct costs</b>           | <b>2.45</b>                     |
| Indirect Costs                      |                                 |
| Engineering and supervision         | 0.33                            |
| Construction expenses               | 0.41                            |
| Legal expenses                      | 0.04                            |
| Contractor's fee                    | 0.22                            |
| Contingency                         | 0.44                            |
| <b>Total indirect costs</b>         | <b>1.44</b>                     |

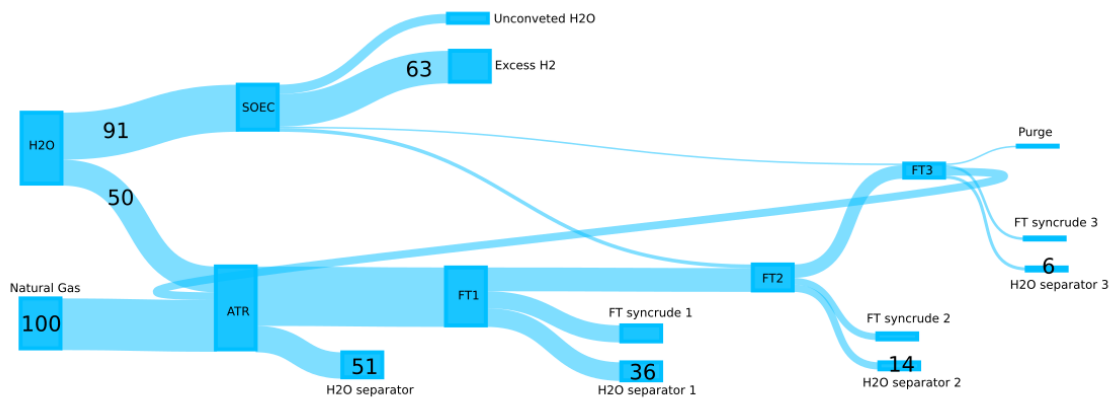

Fig. S1 Hydrogen flow of configuration 1. The basis is 100 hydrogen present in the natural gas

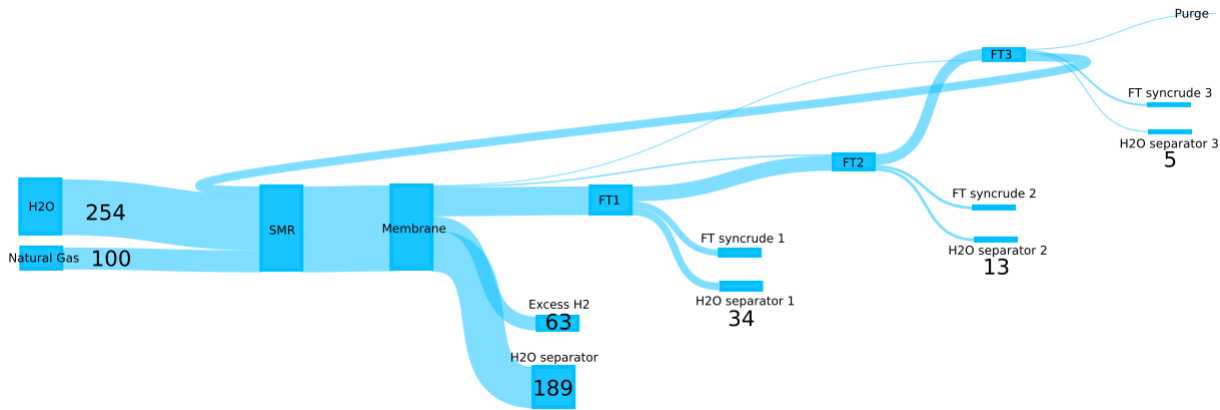

Fig. S2 Hydrogen flow of configuration 2. The basis is 100 hydrogen present in the natural gas

#### Notes and references

- 1 M. S. Peters, K. D. Timmerhaus and R. E. West, *Plant Design and Economics for Chemical Engineers*, 5th ed, McGraw-Hill Professional: New York, 2002.
